# Supplementary material
Source: MDPI journal article supplement (https://www.mdpi.com/2073-4344/10/10/1128)
Supplement: s1 [file s1]

# Supporting Information: A Selective Synthesis of TaON Nanoparticles and their Comparative Study of Photoelectrochemical Properties

Vijay Khanal,<sup>1</sup> Eric Soto-Harrison,<sup>1</sup> Dhanesh Chandra,<sup>1</sup> Narmina O. Balayeva,<sup>2</sup> Detlef W. Bahnemann,<sup>2,3,4</sup> and Vaidyanathan (Ravi) Subramanian<sup>1,2,4\*</sup>

<sup>1</sup> Chemical and Materials Engineering, University of Nevada, Reno, United States – 89557;

vj.khanal20@gmail.com (V.K.); compumaster123@gmail.com (E.S.-H.); dchandra@unr.edu (D.C.)

<sup>2</sup> Institute of Technical Chemistry, Gottfried Wilhelm Leibniz University of Hannover, Callinstr. 5, D-30167 Hannover, Germany; balayeva@iftc.uni-hannover.de (N.O.B.); bahnemann@iftc.uni-hannover.de (D.W.B.)

<sup>3</sup> Laboratory “Photoactive Nanocomposite Materials”, Saint-Petersburg State University, Ulyanovskaya str.1, Peterhof, 198504 Saint-Petersburg, Russia

<sup>4</sup> Laboratory of Nano and Quantum Engineering Gottfried Wilhelm Leibniz University of Hannover, Schneiderberg 39, D-30167 Hannover, Germany

\* Correspondence: ravisv@unr.edu

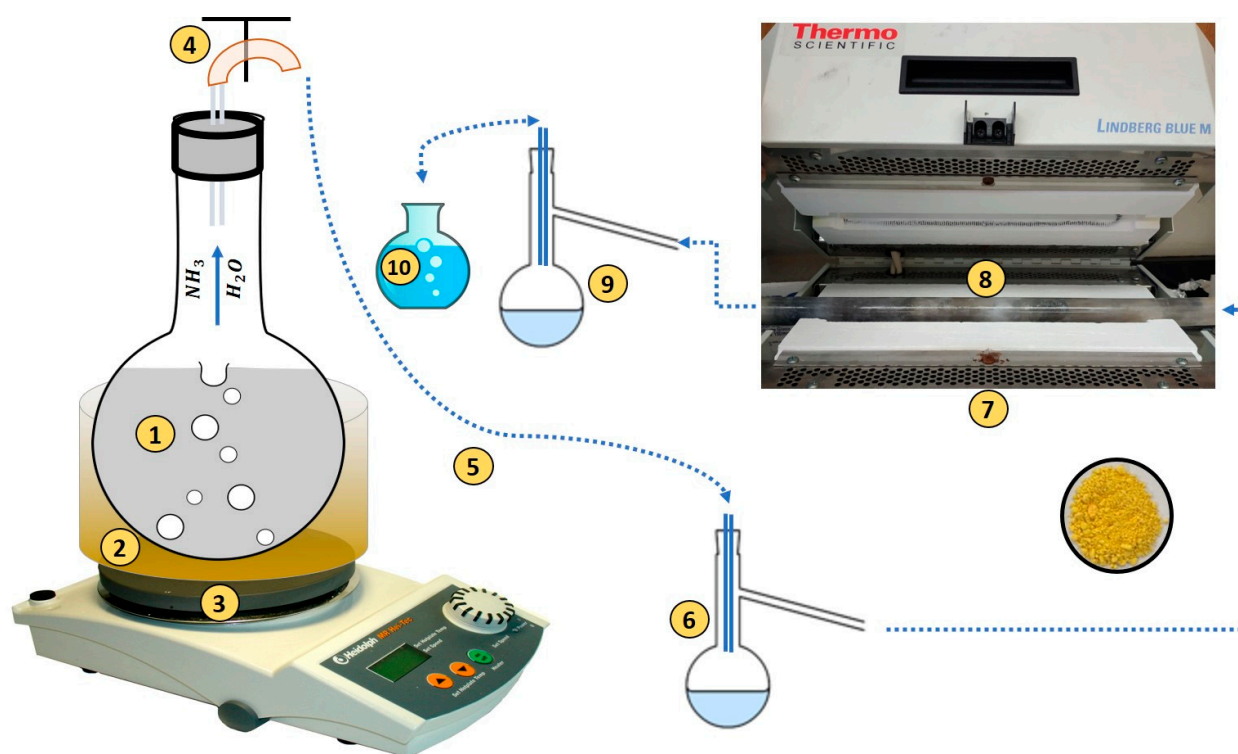

**Figure S1.** The schematic of the simplified TaON synthesis protocol. Labels: (1) ammonium hydroxide mixed in tap-water ( $\text{NH}_4\text{OH}:\text{H}_2\text{O} = 200\text{ml}:150\text{ml}$ ), (2) ethylene glycol used as the heating bath, (3) heating plate ( $350\text{ }^\circ\text{C}$ ), (4) Inlet control valve (opened after the tube furnace reaches  $700\text{ }^\circ\text{C}$ ), (5) Inlet carrier pipe (0.5 inch ID), (6) Excess moisture trap, (7) Tube Furnace equipped with automatic temperature control (8) Oxide sample ( $\sim 0.5\text{g Ta}_2\text{O}_5$ ), (9) Backflow preventer (from exhaust (10) during occasional pressure destabilization).

**Table S1.** The table shows the optical bands emitted from the Mercury (Hg) lamp when they are used as a light sources for the photocatalysis experiments.

| Hg, $\lambda(\text{nm})$ | %, E |
|--------------------------|------|
| 220–280                  | 15.4 |
| 200–320                  | 16.3 |
| 320–400                  | 15.9 |
| 400–800                  | 43.1 |
| 800–1400                 | 9.3  |

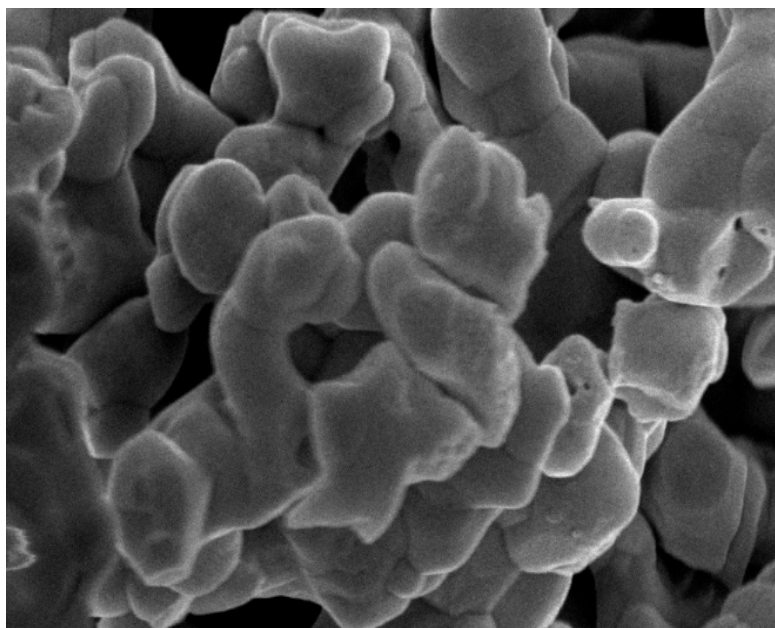

**Figure S2.** Scanning electron microscope image of commercial  $\text{Ta}_2\text{O}_5$  sample.

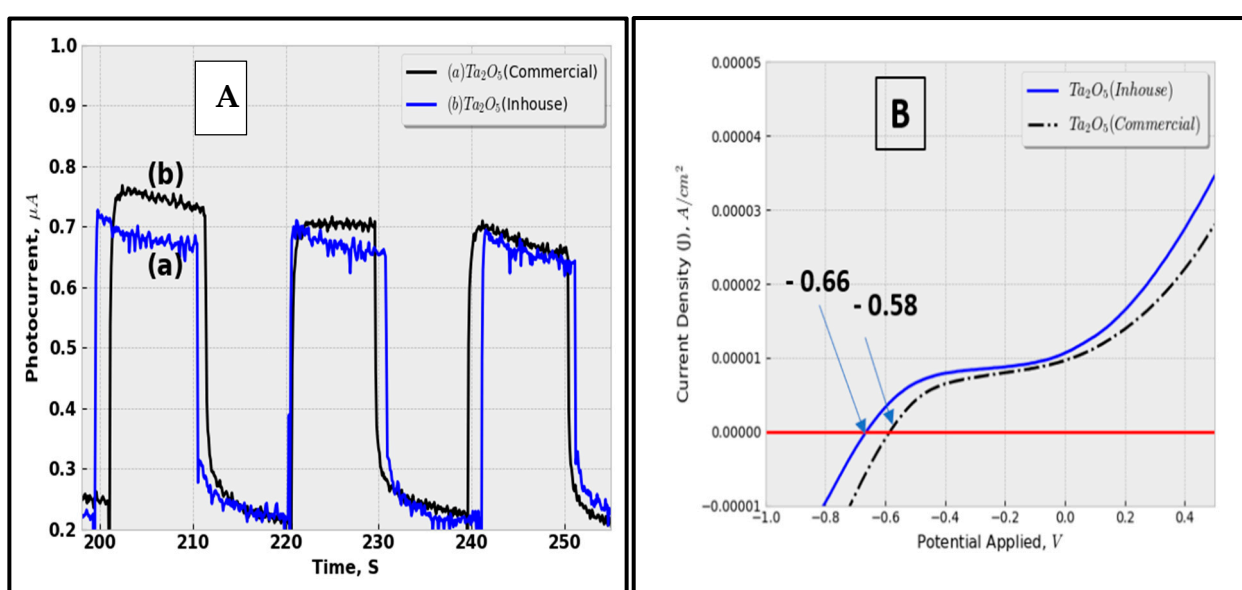

**Figure S3.** (A) Chrono-amperometry (i/t) responses and (B) Linear sweep voltammetry of Commercial and In-house  $\text{Ta}_2\text{O}_5$  (Pt counter electrode, leak-free Ag/AgCl (in 0.2M NaOH) as the reference electrode and sample coated ITO slide as working electrode).

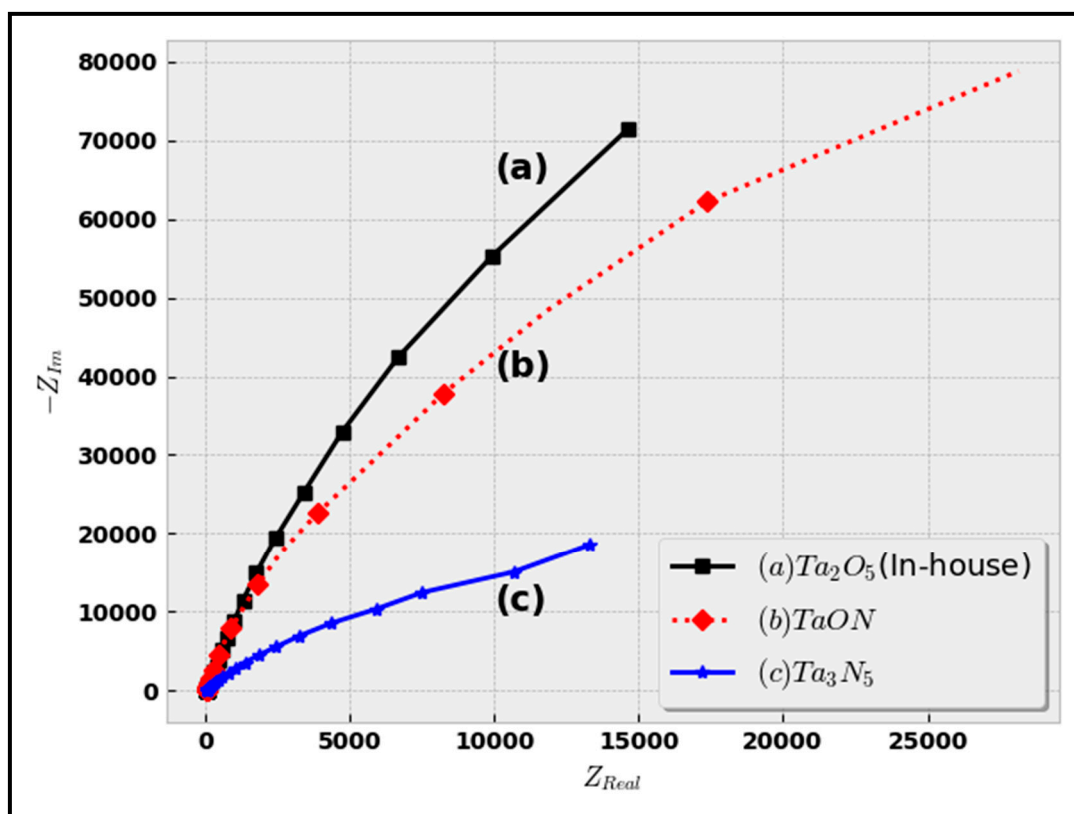

**Figure S4.** The figure shows the results of the electrochemical impedance analysis (EIS, Nyquist Plots) of (a) as-synthesized  $Ta_2O_5$ , (b) TaON, and (c)  $Ta_3N_5$ . (Pt counter electrode, leak-free Ag/AgCl (in 0.2M NaOH) as the reference electrode and sample coated FTO slide as working electrode).
